# Supplementary material for: A new red fluorophore with aggregation enhanced emission by an unexpected “One-step” protocol
Source: Royal Society of Chemistry journal article supplement (doi:10.1039/c8ra00955d), 2018-01-01
Supplement: c8ra00955d1.pdf [file c8ra00955d1.pdf]

## Supporting Information

# A New Red Fluorophore with Aggregation Enhanced Emission by an Unexpected “One-step” Protocol

Rui Wang,<sup>a</sup> Meili Hou,<sup>a</sup> Zhigang Xu,<sup>a</sup> Luxi Tan,<sup>c</sup> Cheng Zhong<sup>\*b</sup> and Linna Zhu<sup>\*a</sup>

<sup>a</sup> *Chongqing Key Laboratory for Advanced Materials and Technologies of Clean Energy, Faculty of Materials & Energy, Southwest University, Chongqing 400715, P.R. China.*

<sup>b</sup> *Department of Chemistry, Hubei Key Lab on Organic and Polymeric Optoelectronic Materials, Wuhan University, Wuhan 430072, P.R. China.*

<sup>c</sup> *School of Chemistry and Chemical Engineering, Chongqing University, Chongqing 401331, P.R. China.*

*Corresponding author e-mail: lnzhu@swu.edu.cn; zhongcheng@whu.edu.cn.*

## Table of Contents

|                                                               |     |
|---------------------------------------------------------------|-----|
| Synthesis of compound BT-CHO .....                            | S2  |
| Parallel experiments of A1 with different substrates .....    | S3  |
| Synthesis of compound A2 .....                                | S3  |
| HPLC analysis .....                                           | S5  |
| TLC plate .....                                               | S5  |
| PL spectra of A1 and A1H2 in solid state .....                | S7  |
| Data calculated at the B3LYP/6-31G (d)* level .....           | S8  |
| Influence of pH on fluorescent intensity of A1H2-NPs .....    | S8  |
| <sup>1</sup> H-NMR, <sup>13</sup> C-NMR, and MS spectra ..... | S9  |
| References .....                                              | S17 |

## Synthesis of compound BT-CHO

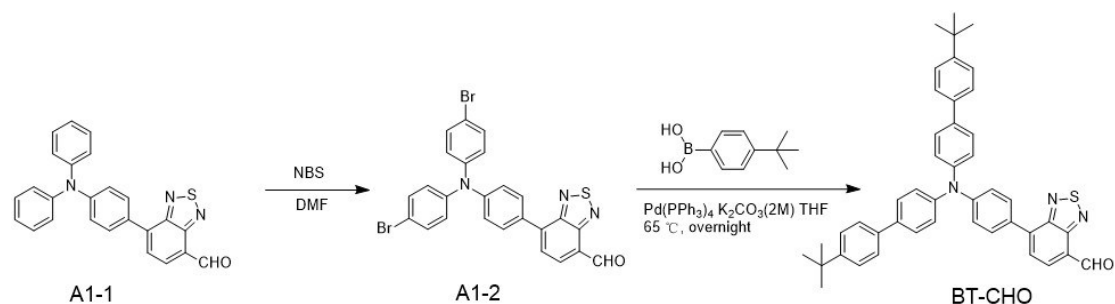

**Scheme S1.** The synthetic route for BT-CHO.

### Synthesis of compound A1-1

Compound **A1-1** were synthesized according to previously reported method.<sup>[1]</sup>

### Synthesis of compound A1-2

A 100 mL of Schlenk flask containing A1-1 (700 mg, 1.02 mmol) was added DMF (15 mL). NBS (670 mg, 3.76 mmol dissolved in 15 mL of DMF) was dropped slowly and the solution was stirred at room temperature for overnight. After the reaction was complete, the reaction mixture was poured into water and then extracted with CH<sub>2</sub>Cl<sub>2</sub>. The organic extract was dried over anhydrous Na<sub>2</sub>SO<sub>4</sub> and was further purified by column chromatography using a dichloromethane/hexanes (2:3) mixture as the eluent. Compound **A1-2** was isolated as a bright red powder in 99% yield. <sup>1</sup>H NMR (600 MHz, CDCl<sub>3</sub>) δ 10.77 (s, 1H), 8.29 (d, *J* = 7.8 Hz, 1H), 7.95 (d, *J* = 9.0 Hz, 2H), 7.85 (d, *J* = 7.2 Hz, 1H), 7.42 (d, *J* = 12.0 Hz, 4H), 7.19 (d, *J* = 6.0 Hz, 2H), 7.05 (d, *J* = 8.4 Hz, 4H). <sup>13</sup>C NMR (150 MHz, CDCl<sub>3</sub>) δ 188.80, 153.99, 153.83, 148.33, 145.87, 139.55, 132.69, 132.44, 130.75, 130.54, 126.49, 126.11, 125.98, 122.80, 116.80.

### Synthesis of compound BT-CHO

Compound **A1-2** (800 mg, 1.42 mmol), (4-(tert-butyl)phenyl)boronic acid (755 mg, 4.24 mmol), Pd(PPh<sub>3</sub>)<sub>4</sub> (97 mg, 0.084 mmol) were loaded into 100 ml Schlenk flask. A mixture of aqueous solution of K<sub>2</sub>CO<sub>3</sub> (7.04 ml, 2 M) and THF (35 ml) were added to flask and stirred at reflux (65 °C) for overnight under argon atmosphere. After the reaction was complete, the reaction mixture was poured into water and then extracted with CH<sub>2</sub>Cl<sub>2</sub>, and evaporated under reduced pressure. The remaining crude product was purified by column chromatography using a dichloromethane/hexanes (2:3) mixture as the eluent. Compound **BT-CHO** was isolated as a red powder in 84% yield. <sup>1</sup>H NMR (600 MHz, CDCl<sub>3</sub>) δ 10.77 (s, 1H), 8.28 (d, *J* = 7.8 Hz, 1H), 7.98

(d,  $J = 8.4$  Hz, 2H), 7.86 (d,  $J = 7.8$  Hz, 1H), 7.55 (t,  $J = 7.8$  Hz, 8H), 7.47 (d,  $J = 8.4$  Hz, 4H), 7.29 (t,  $J = 8.4$  Hz, 6H), 1.37 (s, 16H).  $^{13}\text{C}$  NMR (150 MHz,  $\text{CDCl}_3$ )  $\delta$  188.82, 154.07, 153.90, 150.15, 149.19, 145.96, 139.91, 137.63, 136.63, 132.60, 130.60, 129.51, 127.95, 126.43, 125.79, 125.75, 125.43, 122.37, 34.53, 31.38.

### Parallel experiments of A1 with different substrates

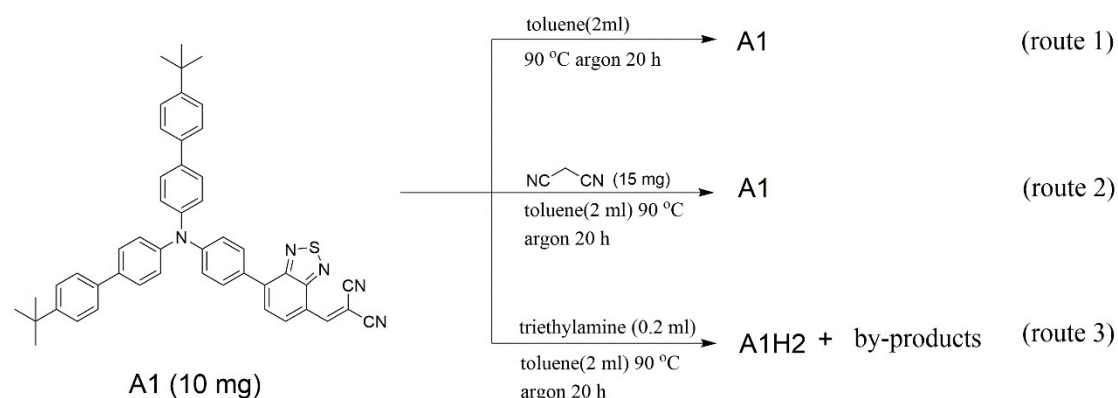

Scheme S2. Three parallel experiments of A1 with different substrates.

### Synthesis of compound A2

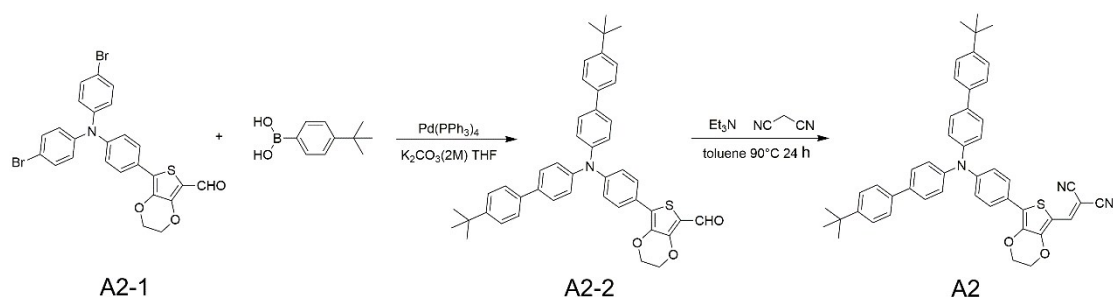

Scheme S3. The synthetic route for A2.

### Synthesis of compound A2-1

Compound A2-1 were synthesized according to previous reported method.<sup>[2]</sup>

### Synthesis of compound A2-2

Compound A2-1 (500 mg, 0.96 mmol), (4-(*tert*-butyl) phenyl) boronic acid (514 mg, 2.88 mmol),  $\text{Pd}(\text{PPh}_3)_4$  (66.7 mg, 0.058 mmol) were loaded into 100 ml Schlenk flask. A mixture of aqueous solution of  $\text{K}_2\text{CO}_3$  (4.80 ml, 2 M) and THF (30 ml) were added to flask and stirred at reflux (65 °C) for overnight under argon ambience. After the reaction was complete, the reaction mixture was

poured into water and then extracted with CH<sub>2</sub>Cl<sub>2</sub>, and evaporated under reduced pressure. The remaining crude product was purified by column chromatography using a dichloromethane/hexanes (3:2) mixture as the eluent. Compound **A2-2** was isolated as an orange powder in 95% yield. <sup>1</sup>H NMR (600 MHz, CDCl<sub>3</sub>) δ 9.91 (s, 1H), 7.70 (d, *J* = 9.0 Hz, 2H), 7.52 (dd, *J* = 8.4, 4.2 Hz, 8H), 7.47 (d, *J* = 8.4 Hz, 4H), 7.22 (d, *J* = 8.4 Hz, 4H), 7.16 (d, *J* = 9.0 Hz, 2H), 4.42 (m, *J* = 7.8 Hz, 2H), 4.38 (m, *J* = 8.4 Hz, 2H), 1.36 (s, 18H). <sup>13</sup>C NMR (150 MHz, CDCl<sub>3</sub>) δ 179.36, 150.08, 148.18, 145.98, 137.59, 137.03, 136.37, 132.48, 128.00, 127.92, 127.88, 126.40, 125.74, 125.11, 122.74, 114.92, 65.15, 64.54, 34.53, 31.38.

### Synthesis of compound **A2**

To a solution of **A2-1** (300 mg, 0.45 mmol) and malononitrile (90 mg, 1.36 mmol) in 15 mL of toluene was added 0.20 mL of triethylamine. After being stirred at 90 °C for 1 h under argon atmosphere, the reaction mixture was poured into water and then extracted with CH<sub>2</sub>Cl<sub>2</sub>. The organic extract was dried over anhydrous Na<sub>2</sub>SO<sub>4</sub> and was further purified by column chromatography using a dichloromethane/hexanes (1:1) mixture as the eluent. Compound **A2** was isolated as a dark powder in 53% yield. <sup>1</sup>H NMR (600 MHz, CDCl<sub>3</sub>) δ 7.83 (s, 1H), 7.72 (d, *J* = 8.4 Hz, 2H), 7.53 (dd, *J* = 8.4, 1.8 Hz, 8H), 7.46 (d, *J* = 8.4 Hz, 4H), 7.22 (d, *J* = 8.4 Hz, 4H), 7.13 (d, *J* = 8.4 Hz, 2H), 4.42 (d, *J* = 3.0 Hz, 2H), 4.36 (s, 2H), 1.36 (s, 24H). <sup>13</sup>C NMR (150 MHz, CDCl<sub>3</sub>) δ 150.22, 149.45, 149.03, 145.60, 144.76, 137.48, 136.95, 136.88, 132.07, 128.40, 127.98, 126.44, 125.77, 125.49, 124.13, 121.96, 115.47, 114.54, 109.65, 65.60, 64.48, 34.55, 31.38. HRMS (APCI): calcd for C<sub>48</sub>H<sub>44</sub>N<sub>3</sub>O<sub>2</sub>S [M + H]<sup>+</sup>: 726.3149, found 726.3155.

## HPLC analysis

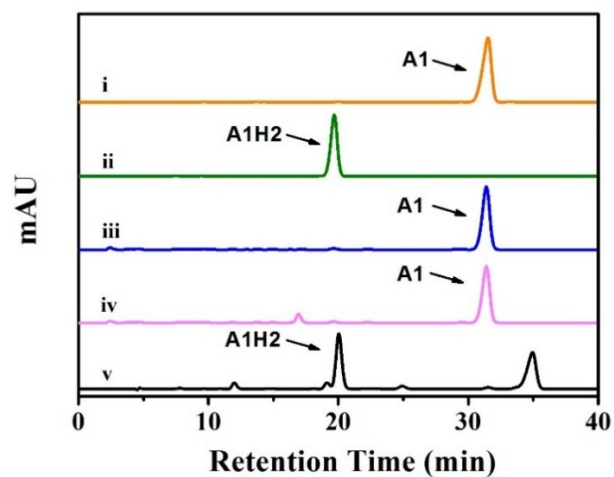

**Fig. S1** HPLC profile showing the reactions of A1 with different substrates: (i) A1 alone, (ii) A1H2 alone, (iii) A1+toluene, (iv) A1+toluene+malononitrile, (v) A1+toluene+triethylamine.

## TLC plate

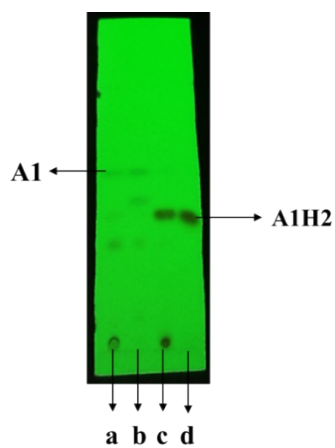

**Fig. S2** a, b and c correspond to the reactions using piperidine, diethylamine and hexylamine as base, respectively; d represents the pure A1H2.

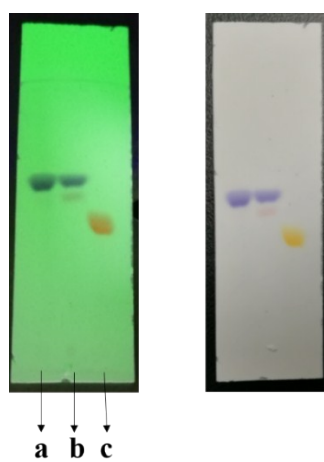

**Fig. S3** a and c represent the pure A1 and A1H2, respectively. b is the reaction of A1 with amantadine.

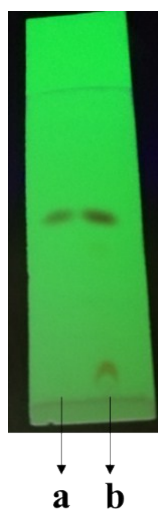

**Fig. S4** a represents the pure A2. b is the reaction using the hexylamine as the base.

## PL spectra of A1 and A1H2 in solid state

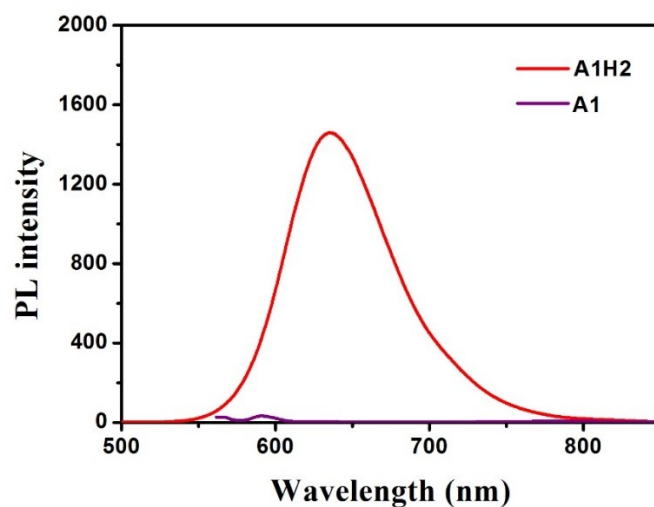

Fig. S5 PL spectra of A1 (purple line) and A1H2 (red line) in solid state (excitation wavelength for A1: 550 nm, excitation wavelength for A1H2: 385 nm).

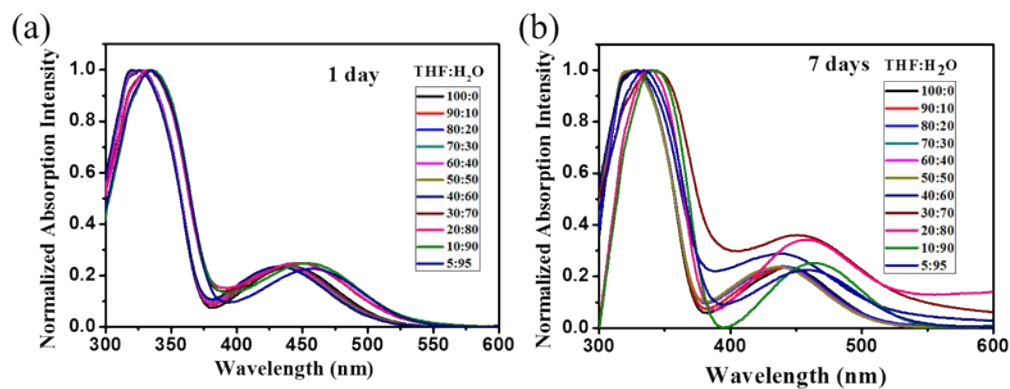

Fig. S6 Normalized Absorption spectra of A1H2-NPs at different water fractions aged for (a) 1 day and (b) 7 days.

Table S1. The maximum absorption wavelength of A1H2-NPs at different water fractions after aging for 1 day and 7 days.

|       | $\lambda_{\text{abs}}$ (nm) |     |     |     |     |     |     |     |     |     |     |
|-------|-----------------------------|-----|-----|-----|-----|-----|-----|-----|-----|-----|-----|
|       | 0%                          | 10% | 20% | 30% | 40% | 50% | 60% | 70% | 80% | 90% | 95% |
| 1day  | 441                         | 438 | 436 | 436 | 435 | 433 | 433 | 447 | 447 | 454 | 459 |
| 7days | 443                         | 441 | 439 | 437 | 437 | 437 | 439 | 449 | 457 | 463 | 459 |

## Data calculated at the B3LYP/6-31G (d)\* level

**Table S2.** Data calculated at the B3LYP/6-31G (d)\* level

| Sample      | $f^a$  | Orb: Compos (%) | $\lambda_{\text{calc em}}^b/\text{nm}$ |
|-------------|--------|-----------------|----------------------------------------|
| <b>A1H2</b> | 0.2760 | HOMO→LUMO:98.4  | 672.98                                 |
| <b>A1</b>   | 0.5136 | HOMO→LUMO:99.2  | 914.33                                 |

<sup>a</sup> Oscillator strength. <sup>b</sup> Emission maximum ( $\lambda_{\text{em}}$ ) derived from theoretical DFT calculations.

## Influence of pH on fluorescent intensity of A1H2-NPs

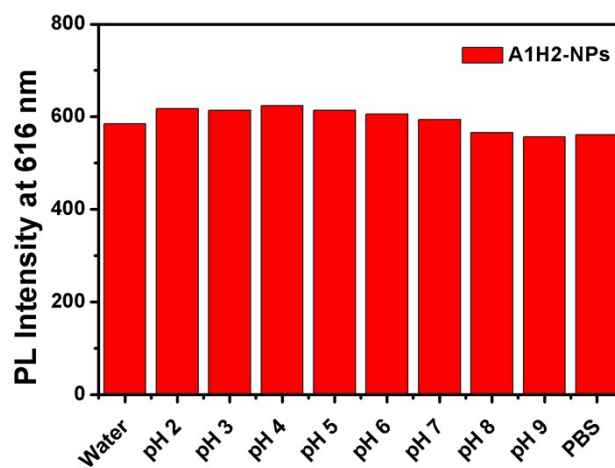

**Fig. S7** Fluorescence intensity of the A1H2-NPs at 616 nm in PBS (pH 7.4), and other buffer solutions with pH ranging from 2 to 9, compared with that in deionized water.



# $^1\text{H}$ -NMR, $^{13}\text{C}$ -NMR, and MS spectra

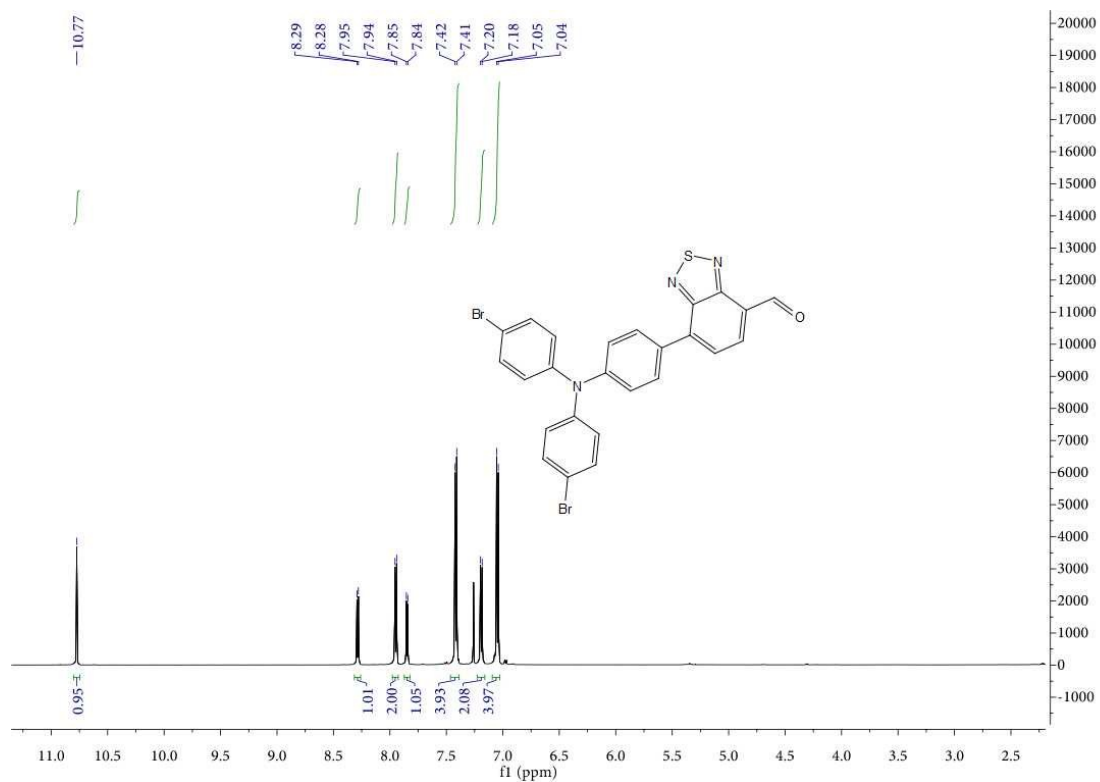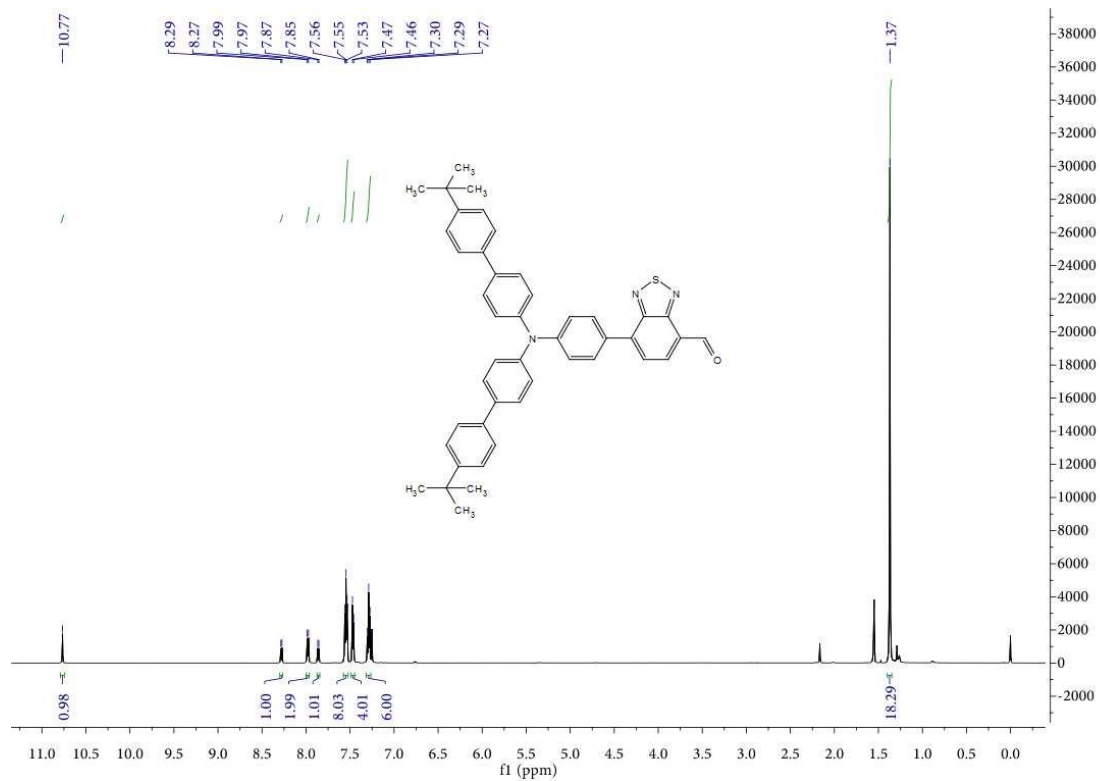

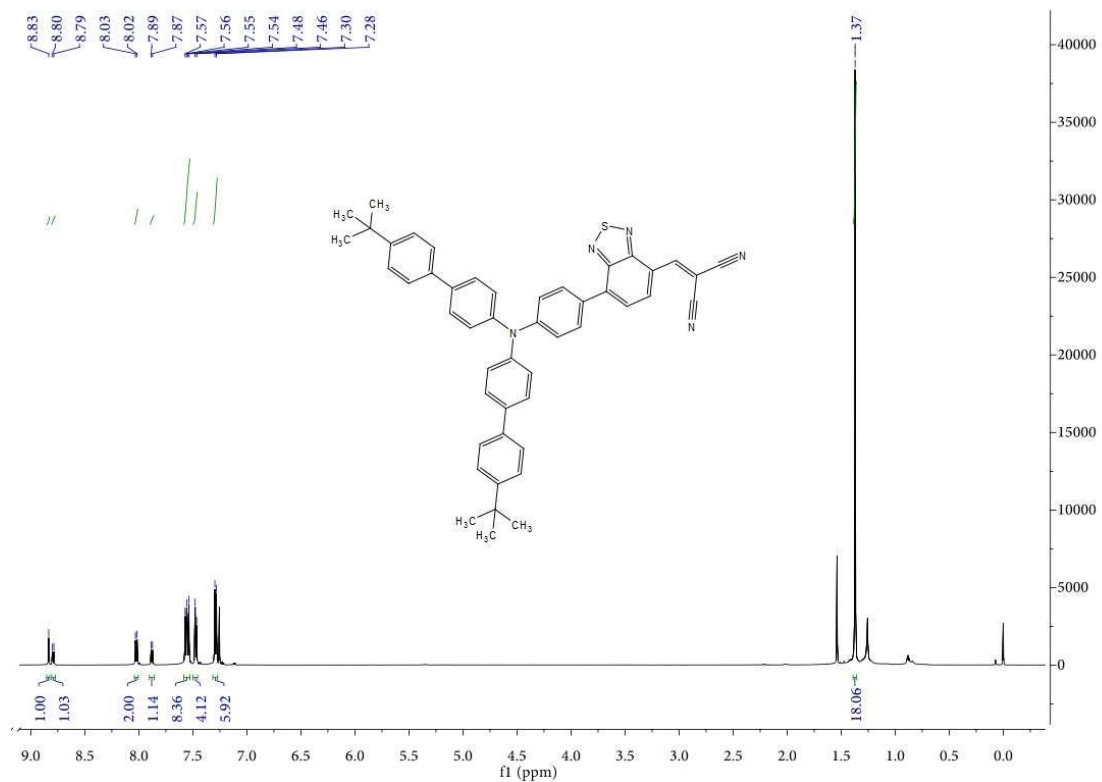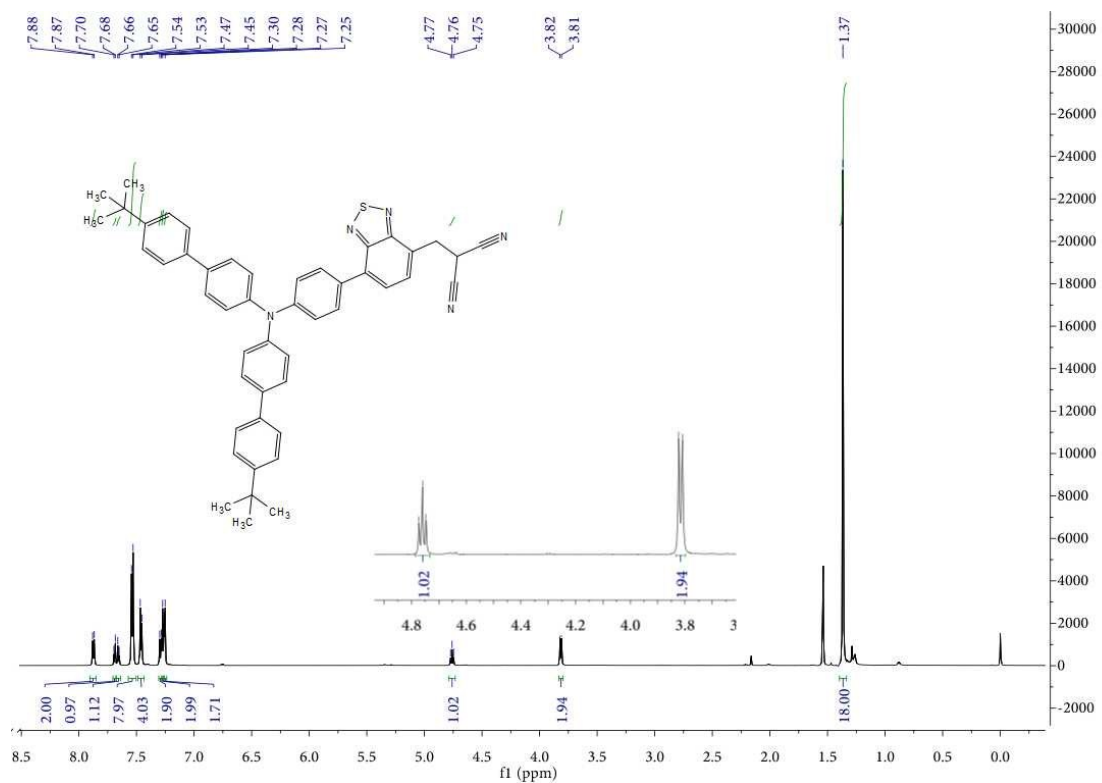

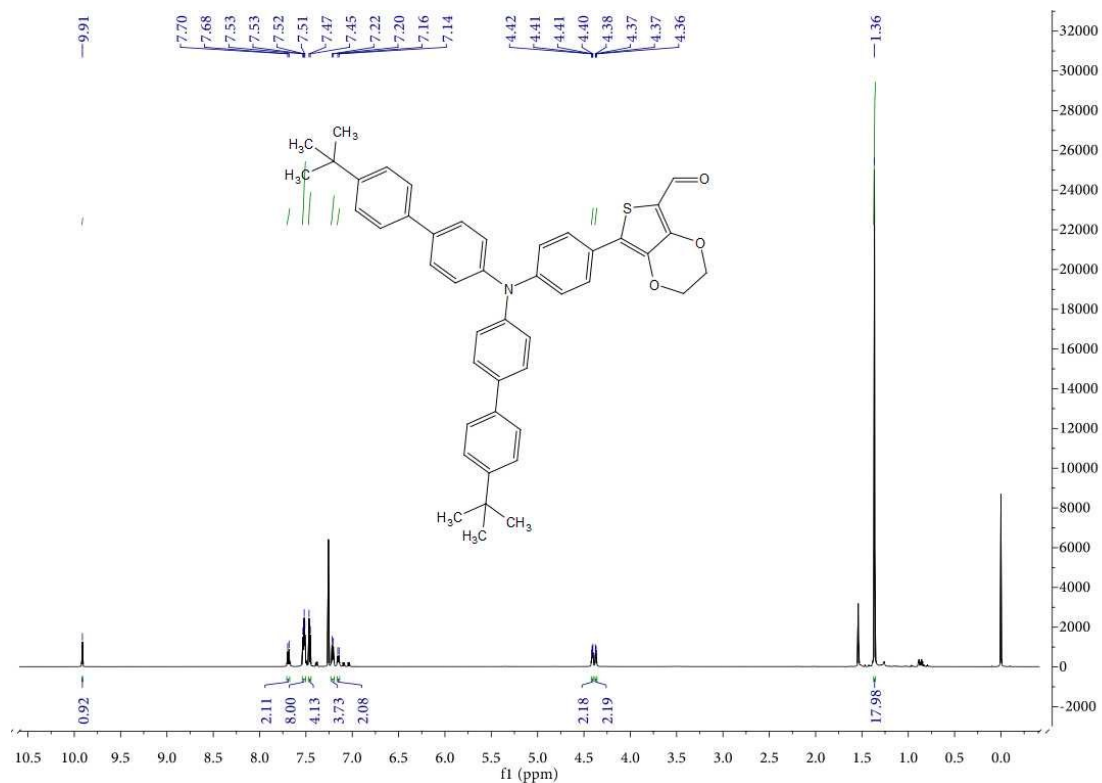

Fig. S12  $^1\text{H}$  NMR spectrum of A2-2 in  $\text{CDCl}_3$

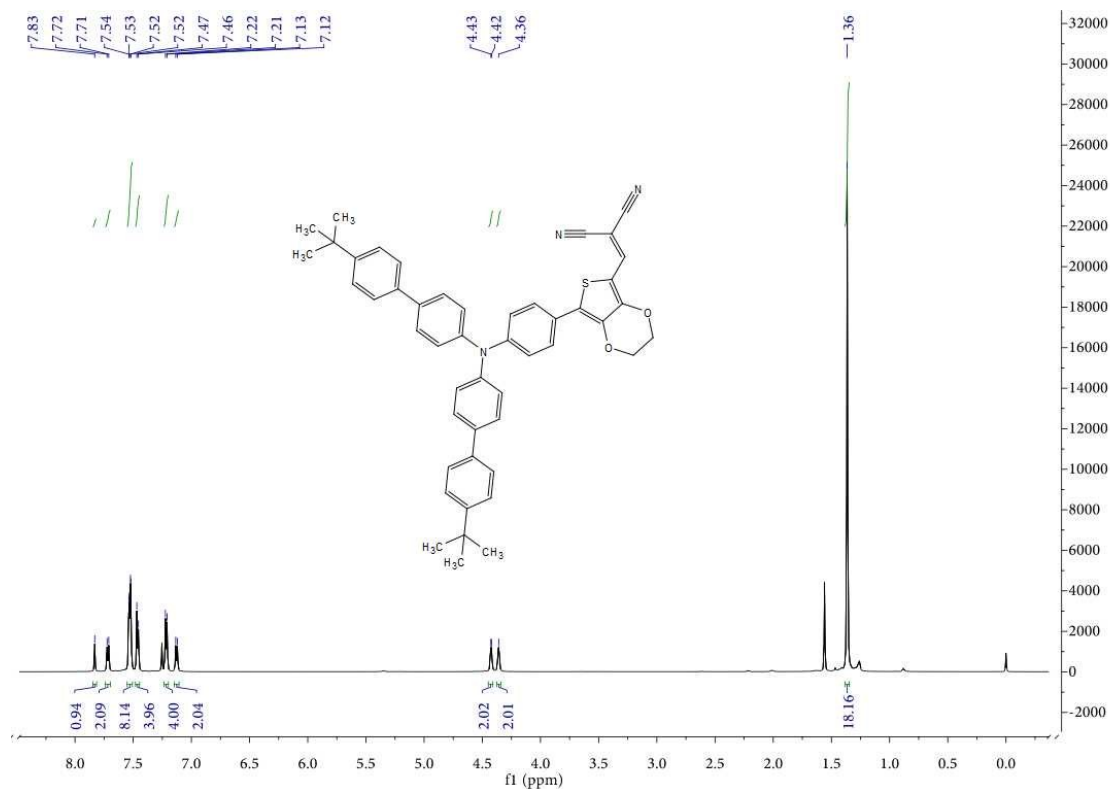

Fig. S13  $^1\text{H}$  NMR spectrum of A2 in  $\text{CDCl}_3$

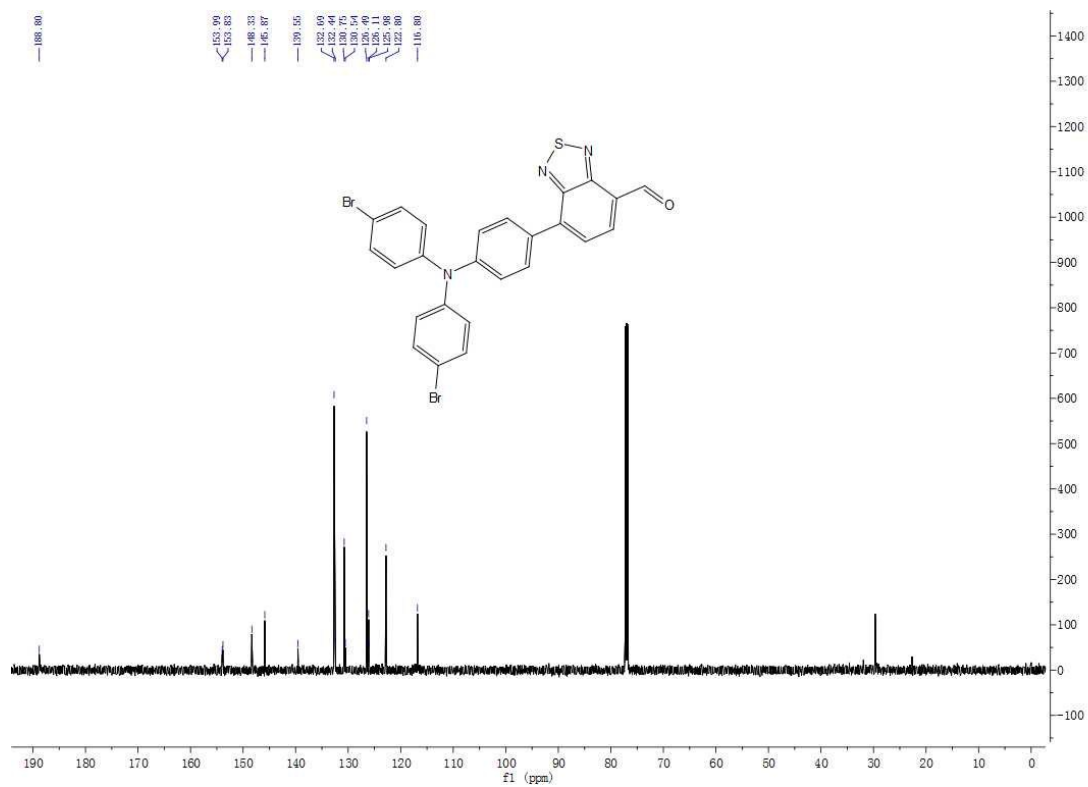

Fig. S14  $^{13}\text{C}$  NMR spectrum of A1-2 in  $\text{CDCl}_3$

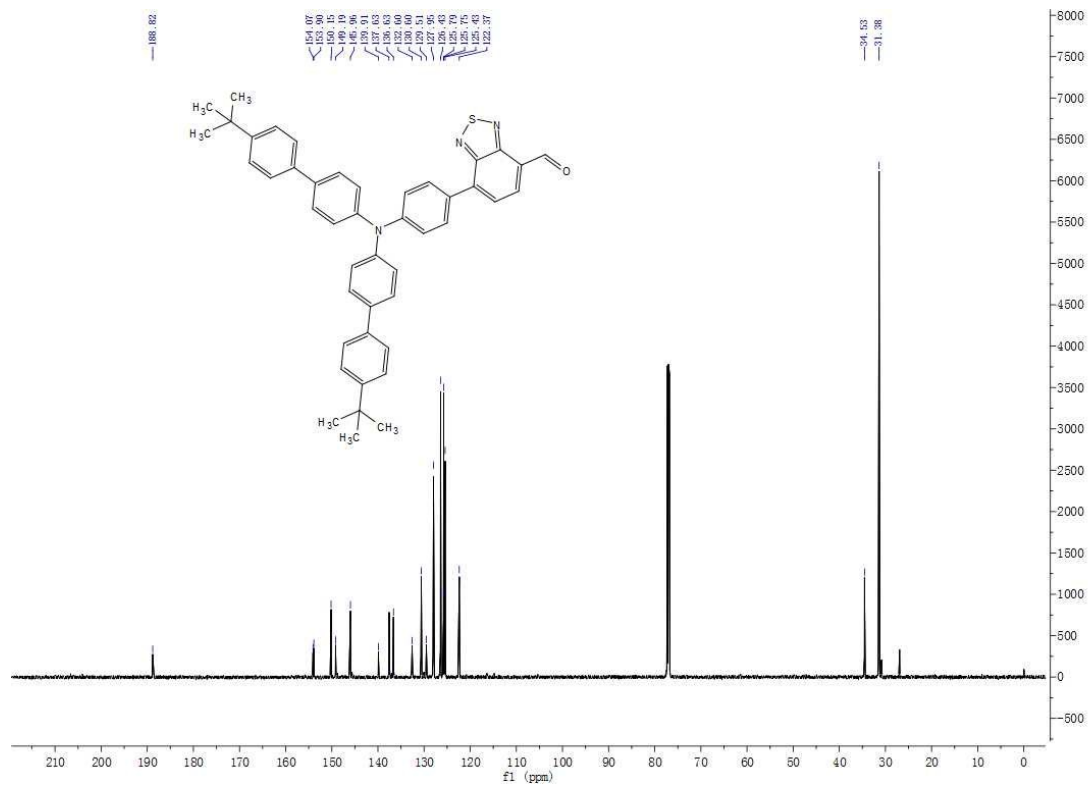

Fig. S15  $^{13}\text{C}$  NMR spectrum of BT-CHO in  $\text{CDCl}_3$

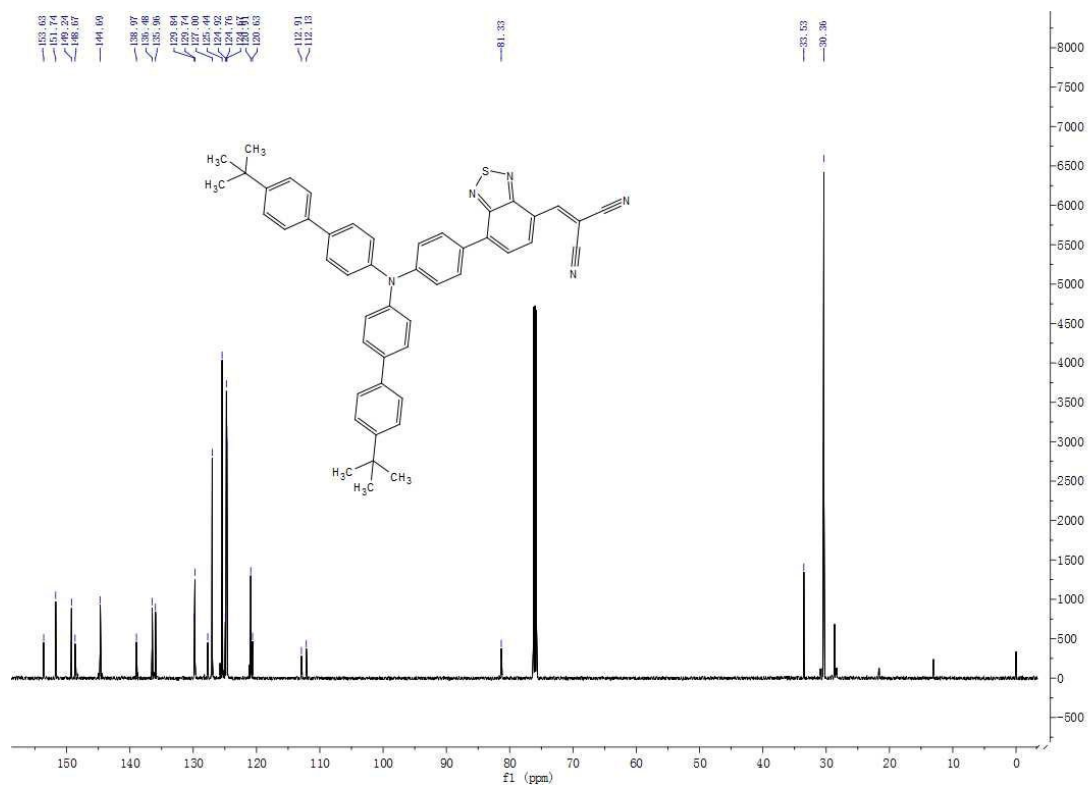

Fig. S16 <sup>13</sup>C NMR spectrum of A1 in CDCl<sub>3</sub>

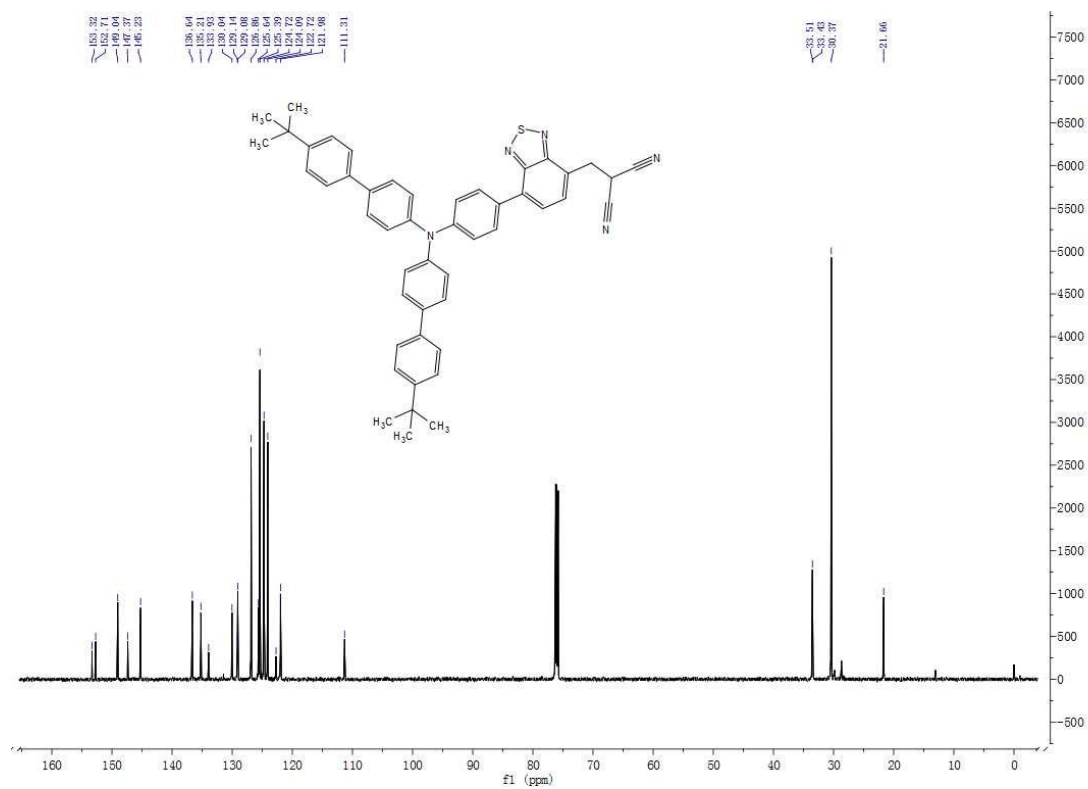

Fig. S17 <sup>13</sup>C NMR spectrum of A1H2 in CDCl<sub>3</sub>

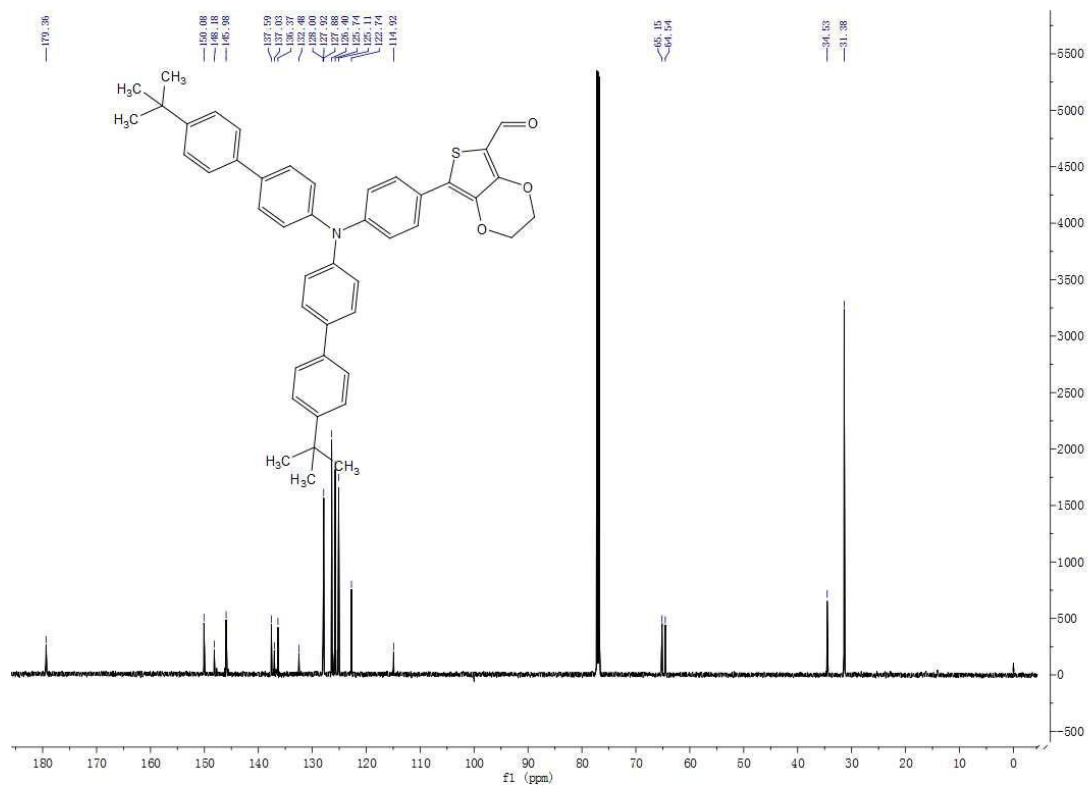

Fig. S18 <sup>13</sup>C NMR spectrum of A2-2 in CDCl<sub>3</sub>

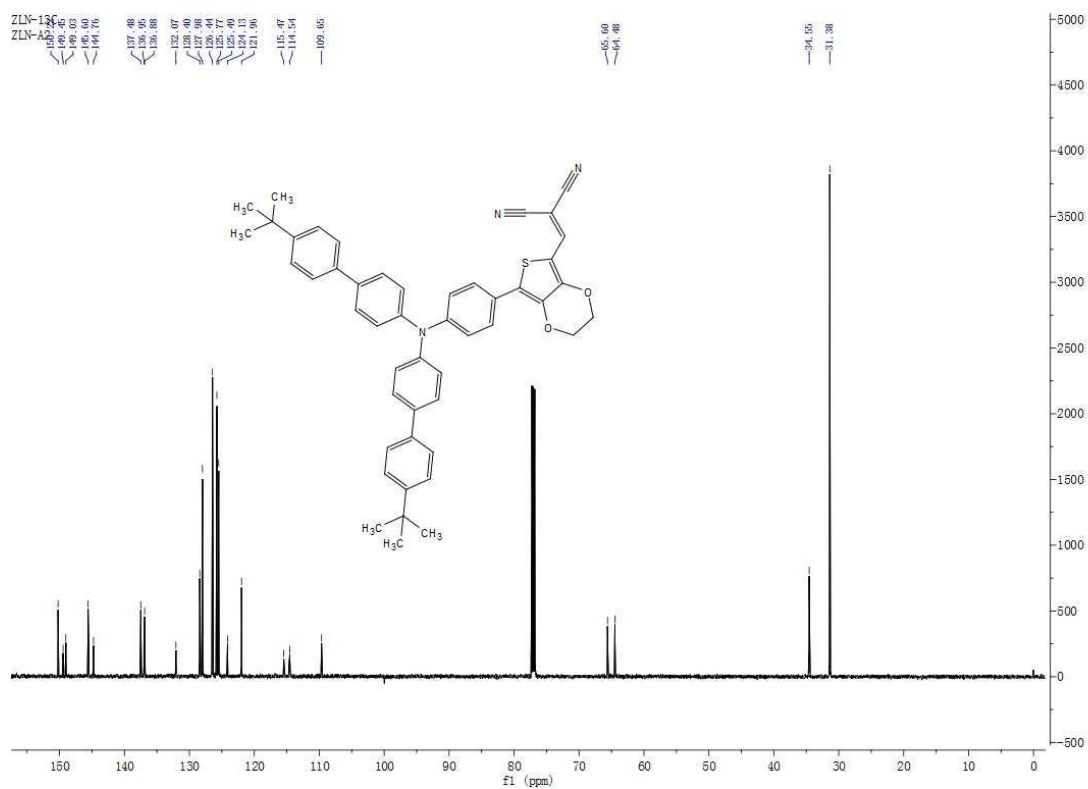

Fig. S19 <sup>13</sup>C NMR spectrum of A2 in CDCl<sub>3</sub>

# MALDI,A1,20170411

## Analysis Info

Analysis Name D:\Data\MALDI\2017\0411\A1\_0\_H3\_000001.d  
Method MALDI\_P\_100-3000  
Sample Name  
Comment

Acquisition Date 4/11/2017 3:43:22 PM

Operator  
Instrument solariX

## Acquisition Parameter

|                       |            |                      |           |                       |                          |
|-----------------------|------------|----------------------|-----------|-----------------------|--------------------------|
| Acquisition Mode      | Single MS  | Acquired Scans       | 2         | Calibration Date      | Mon Apr 10 04:54:22      |
| Polarity              | Positive   | No. of Cell Fills    | 1         | Data Acquisition Size | 2097152                  |
| Broadband Low Mass    | 202.1 m/z  | No. of Laser Shots   | 10        | Data Processing Size  | 4194304                  |
| Broadband High Mass   | 1200.0 m/z | Laser Power          | 23.8 lp   | Apodization           | Sine-Bell Multiplication |
| Source Accumulation   | 0.001 sec  | Laser Shot Frequency | 0.020 sec |                       |                          |
| Ion Accumulation Time | 0.300 sec  |                      |           |                       |                          |

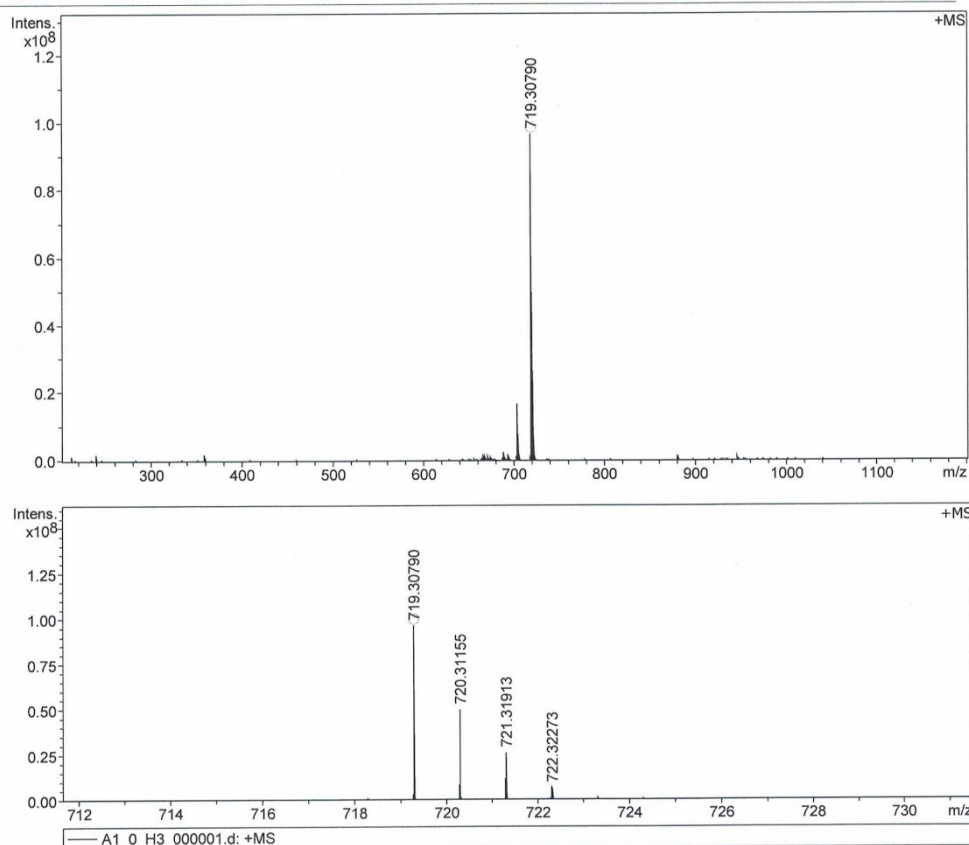

| Meas. m/z  | # | Ion Formula | Score  | m/z        | err [ppm] | Mean err [ppm] | mSigma | rdb  | e <sup>-</sup> Conf | N-Rule |
|------------|---|-------------|--------|------------|-----------|----------------|--------|------|---------------------|--------|
| 719.307905 | 1 | C48H41N5S   | 100.00 | 719.307719 | 0.3       | -0.5           | 77.0   | 31.0 | odd                 | ok     |

Fig. S20 MALDI-TOF-MS of A1

| Sample No. | Formula (M)                                      | Ion Formula                                      | Measured<br>m/z | Calc m/z | Diff<br>(ppm) |
|------------|--------------------------------------------------|--------------------------------------------------|-----------------|----------|---------------|
| A1H2       | C <sub>48</sub> H <sub>43</sub> N <sub>5</sub> S | C <sub>48</sub> H <sub>44</sub> N <sub>5</sub> S | 722.3331        | 722.3319 | 1.66          |

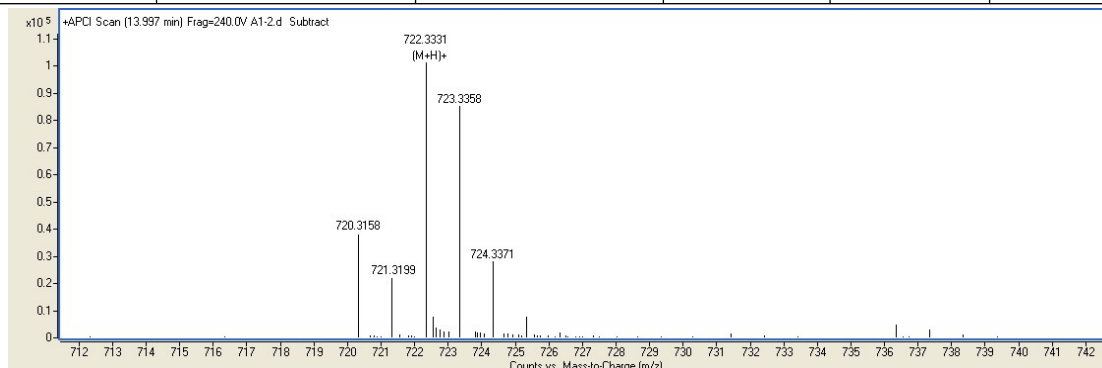

**Fig. S21** HRMS of A1H2

| Sample No. | Formula (M)                                                     | Ion Formula                                                     | Measured<br>m/z | Calc m/z | Diff<br>(ppm) |
|------------|-----------------------------------------------------------------|-----------------------------------------------------------------|-----------------|----------|---------------|
| A2         | C <sub>48</sub> H <sub>43</sub> N <sub>3</sub> O <sub>2</sub> S | C <sub>48</sub> H <sub>44</sub> N <sub>3</sub> O <sub>2</sub> S | 726.3155        | 726.3149 | 0.97          |

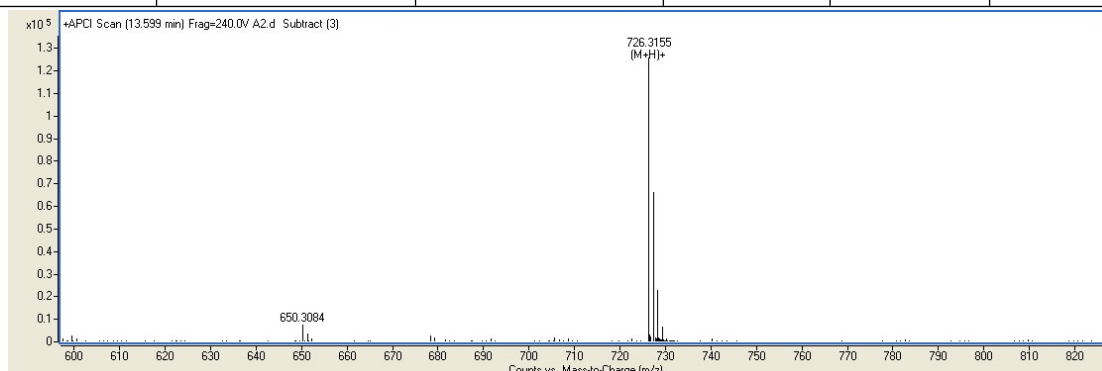

**Fig. S22** HRMS of A2



## References

- [1] Roh, D.-H.; Kim, K. M.; Nam, J. S.; Kim, U.-Y.; Kim, B.-M.; Kim, J. S.; Kwon, T.-H. *J. Phys. Chem. C*, 2016, **120**, 24655.
- [2] Hua, Y.; Jin, B.; Wang, H.; Zhu, X.; Wu, W.; Cheung, M.-S.; Lin, Z.; Wong, W.-Y.; Wong, W.-K. *J Power Sources*, 2013, **237**, 195.
